# Supplementary material for: Transition metal oxynitride catalysts for electrochemical reduction of nitrogen to ammonia
Source: Royal Society of Chemistry journal article supplement (doi:10.1039/d0ma00849d), 2020-12-23
Supplement: d0ma00849d1.pdf [file d0ma00849d1.pdf]

Supporting Information

**Transition Metal Oxynitrides Catalysts for Electrochemical Reduction of Nitrogen to Ammonia**

Damilola Ologunagba, and Shyam Kattel\*  
*Department of Physics, Florida A&M University*  
Tallahassee, FL 32307 USA

\*Corresponding author: [shyam.kattel@famu.edu](mailto:shyam.kattel@famu.edu)

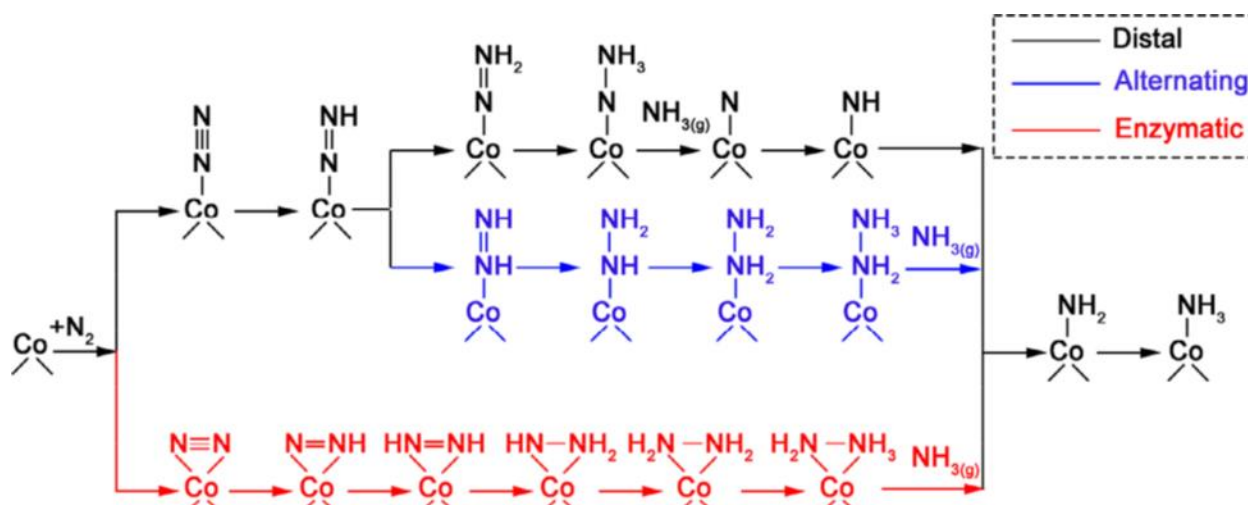

**Figure S1.** Three main pathways for ENRR: (i) distal, (ii) alternating, and (iii) enzymatic. (Figure adapted from ref.<sup>1</sup> with permission).

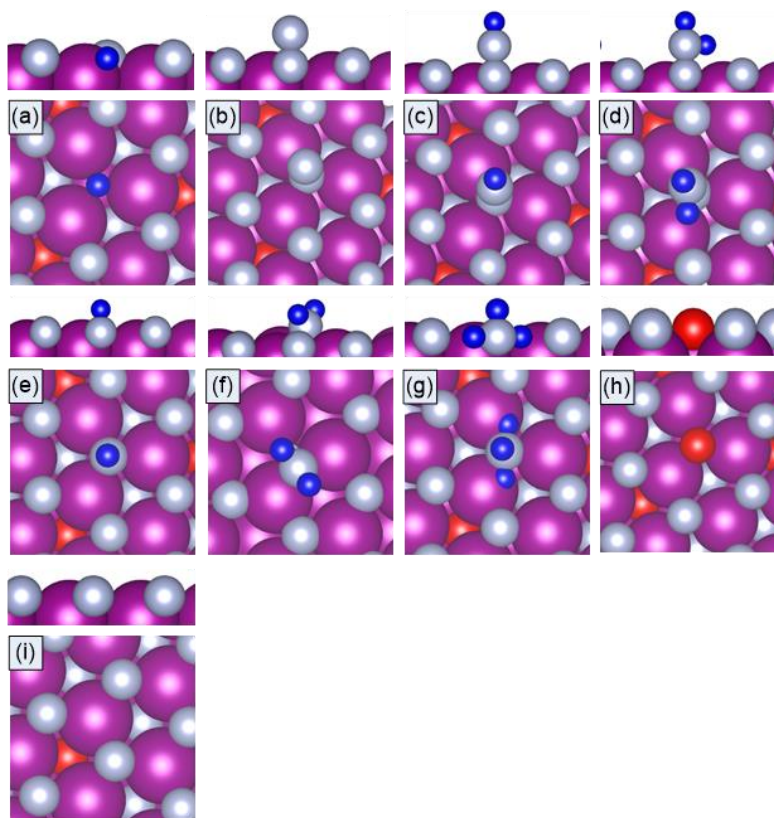

**Figure S2.** DFT optimized geometries of (a) \*H, (b) \*N<sub>2</sub>, (c) \*N<sub>2</sub>H, (d) \*N<sub>2</sub>H<sub>2</sub>, (e) \*NH, (f) \*NH<sub>2</sub>, (g) \*NH<sub>3</sub>, (h) \*O, and (i) \*N adsorbed on O-vac of MnNO(111). Mn: purple, N: gray, O: red, H: blue.

**Table S1.** ZPE and TS values of the adsorbed species.

| species                        | ZPE/eV | TS/eV |
|--------------------------------|--------|-------|
| *N <sub>2</sub>                | 0.18   | 0.18  |
| *N <sub>2</sub> H              | 0.51   | 0.08  |
| *N <sub>2</sub> H <sub>2</sub> | 0.87   | 0.11  |
| *HNNH                          | 0.84   | 0.15  |
| *N                             | 0.10   | 0.02  |
| *H                             | 0.18   | 0.00  |
| *NH                            | 0.38   | 0.04  |
| *NH <sub>2</sub>               | 0.67   | 0.07  |
| *NH <sub>3</sub>               | 1.01   | 0.12  |
| H <sub>2</sub> (g)             | 0.27   | 0.41  |
| N <sub>2</sub> (g)             | 0.15   | 0.60  |
| NH <sub>3</sub> (g)            | 0.89   | 0.74  |
| H <sub>2</sub> O(g)            | 0.58   | 0.65  |

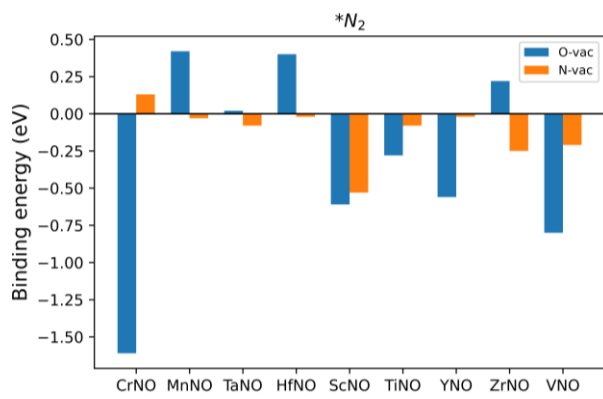

(a)

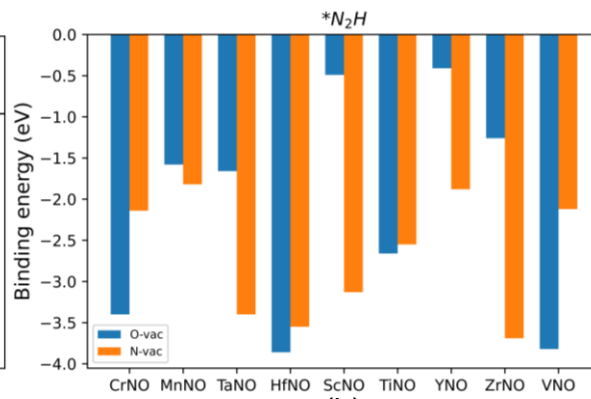

(b)

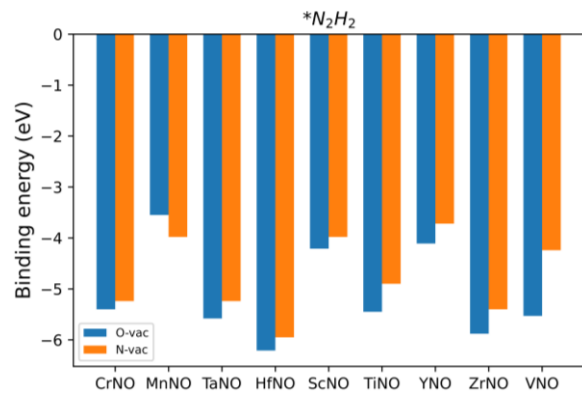

(c)

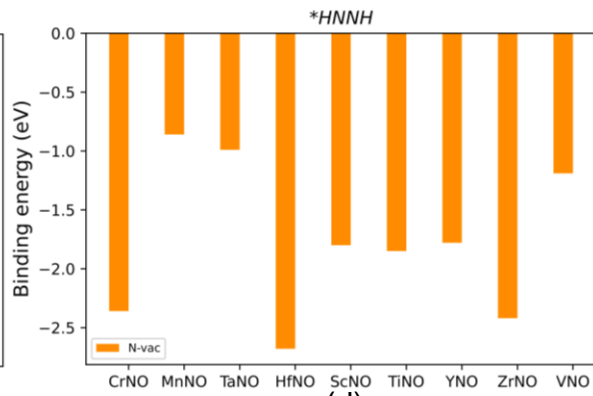

(d)

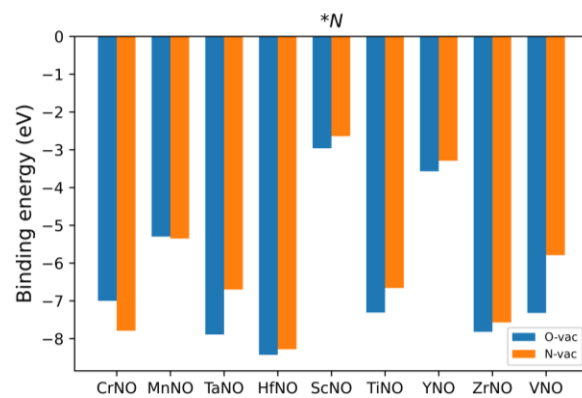

(e)

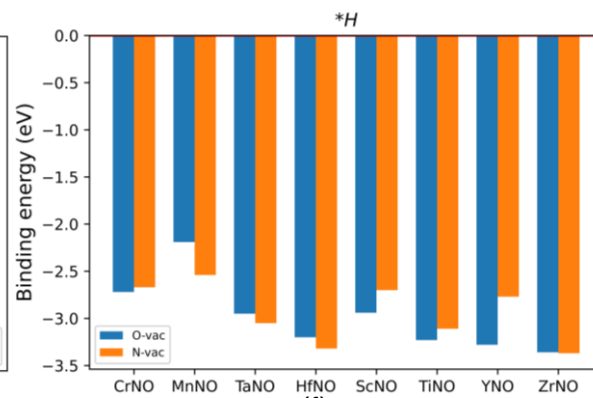

(f)

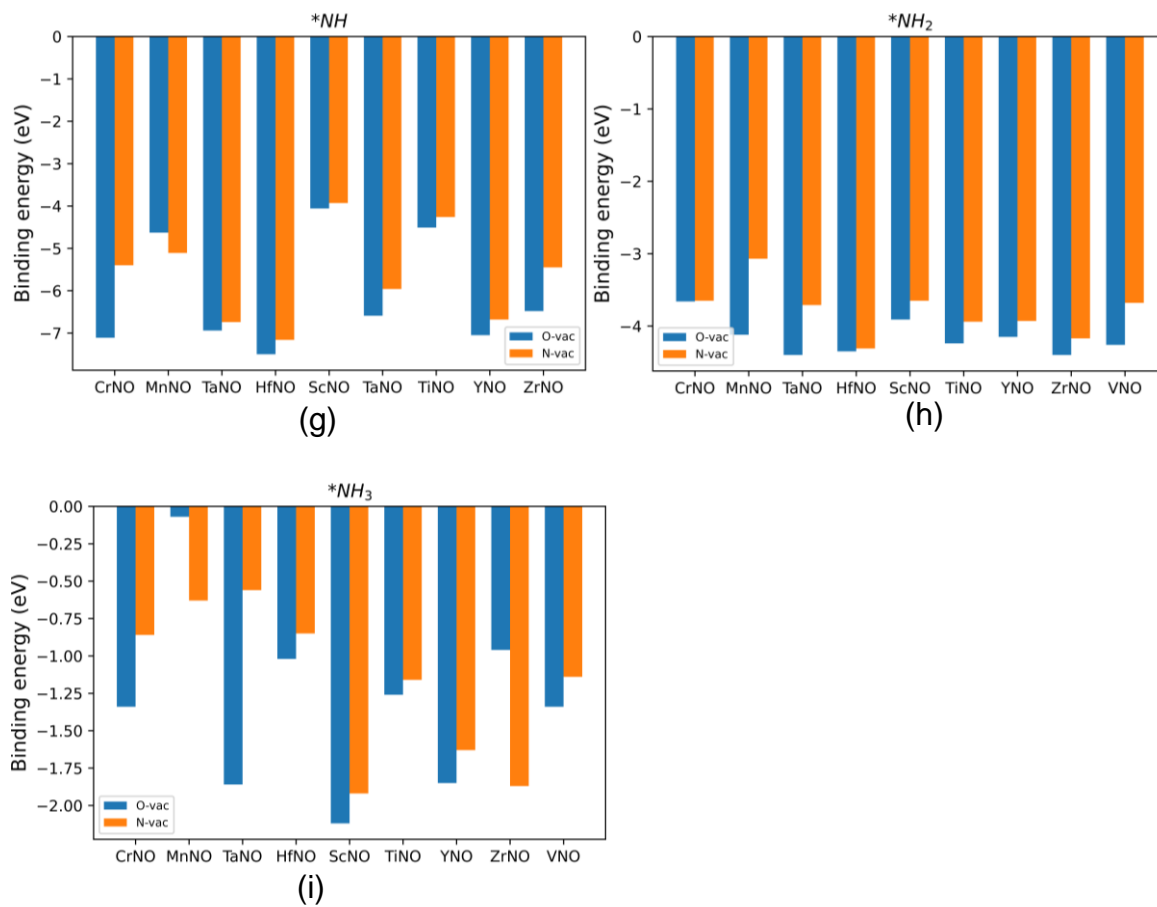

**Figure S3.** DFT calculated binding energies of reaction intermediates on N-vac and O-vac.

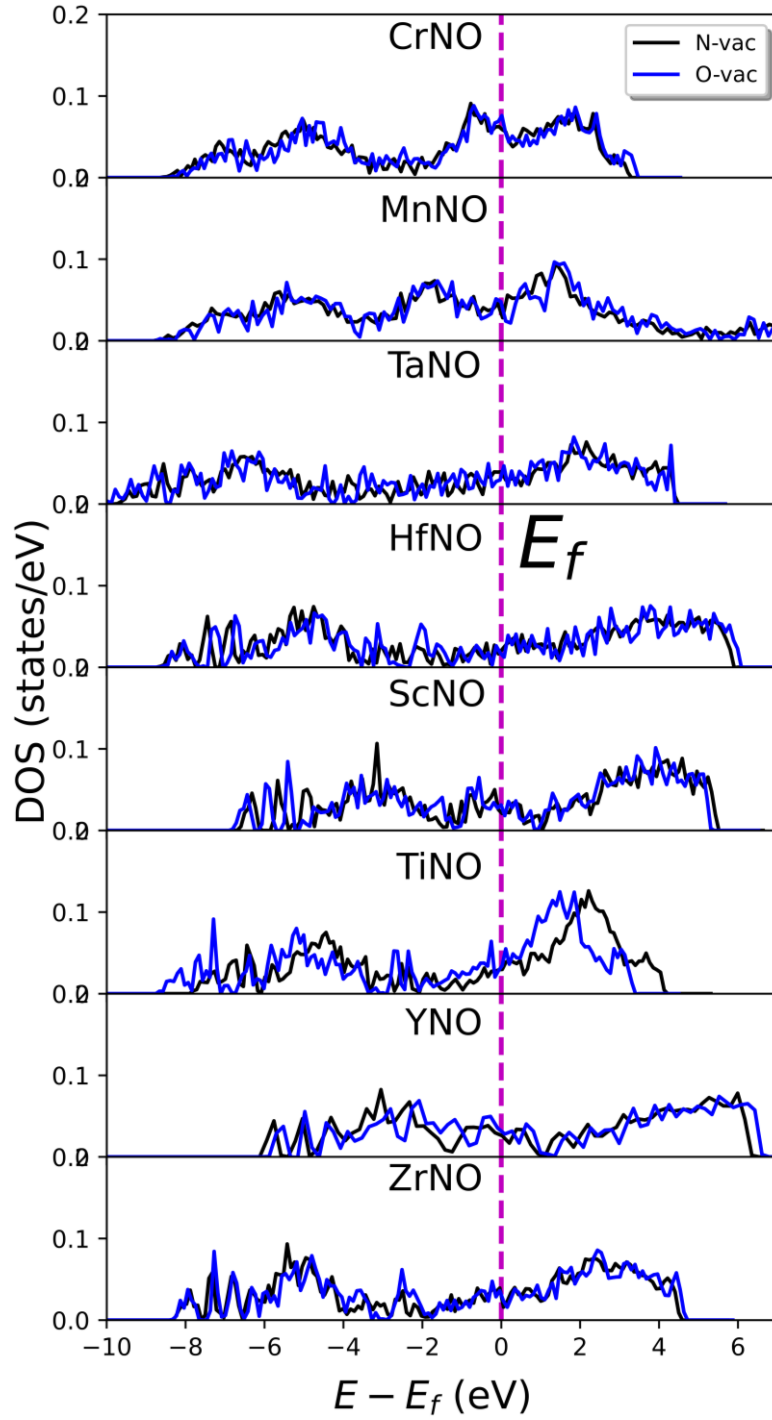

**Figure S4.** Density of state (DOS) plots for all the TMNO on N-vac and O-vac.

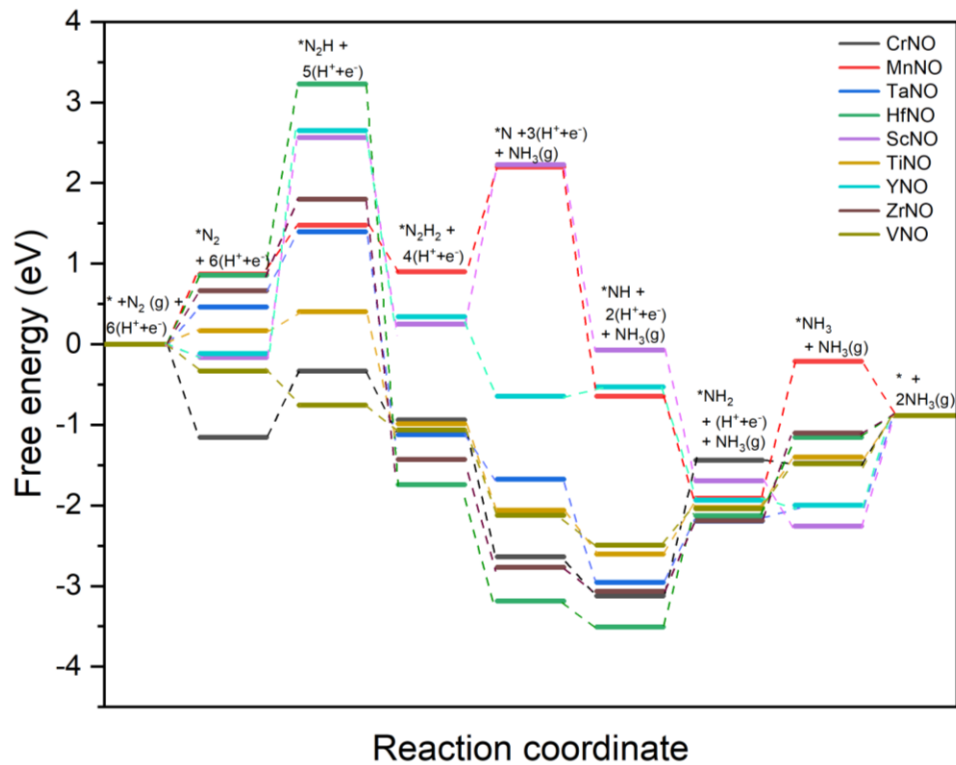

**Figure S5.** DFT calculated free energy diagrams at  $U = 0$  V along the associative  $N_2H_2$  pathway on O-vacancy.

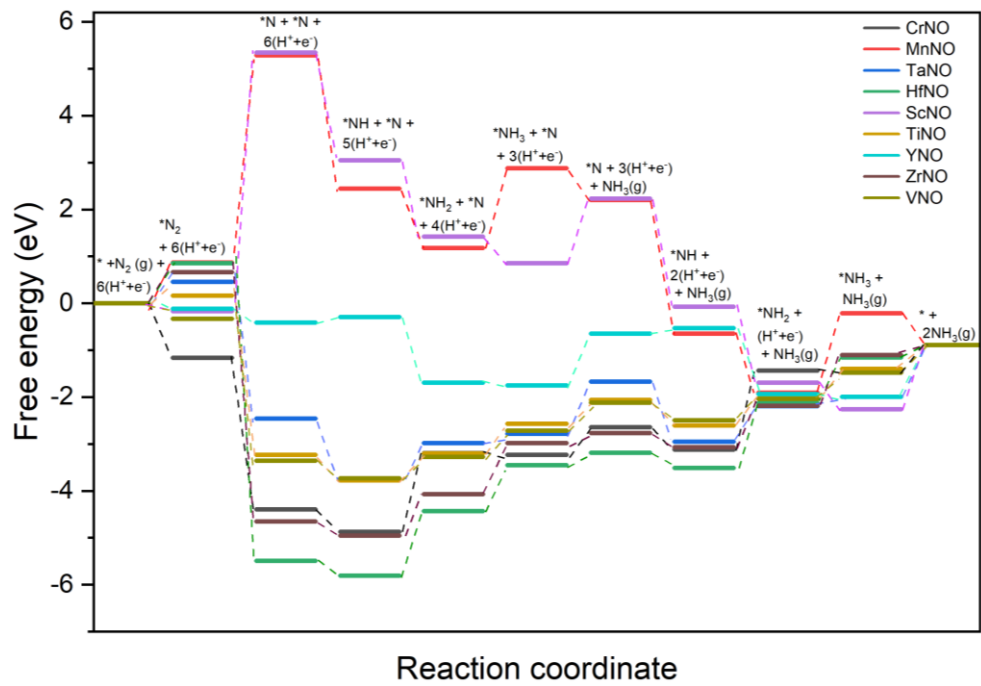

**Figure S6.** DFT calculated free energy diagrams of ENRR at  $U = 0$  V along the dissociative pathway on O-vac.

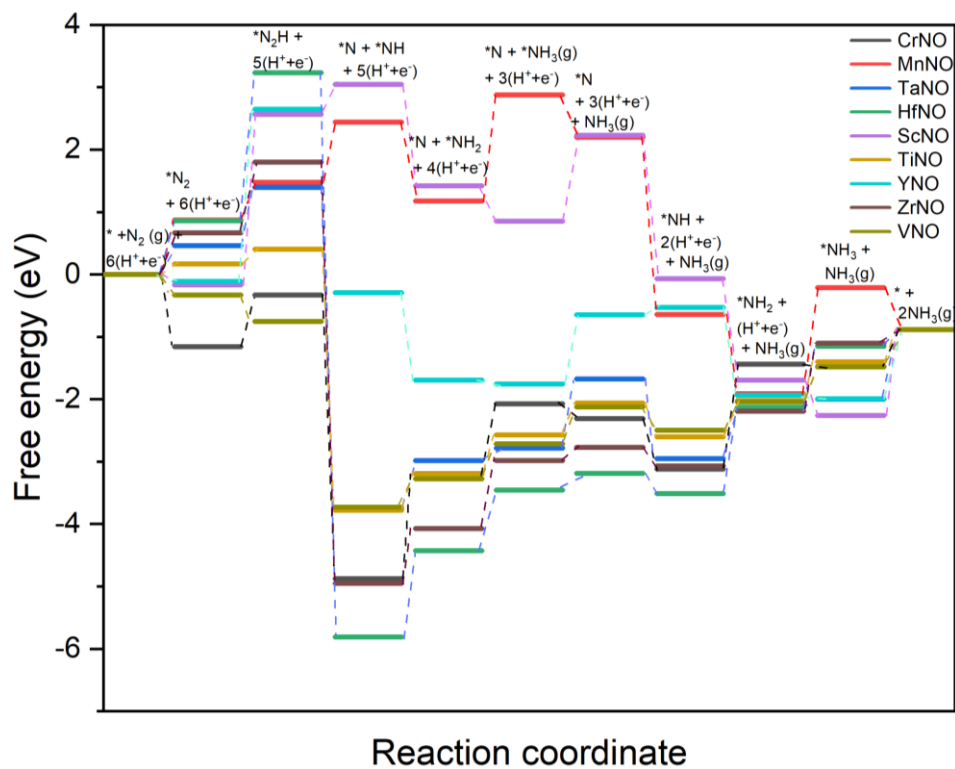

**Figure S7.** DFT calculated free energy diagrams of ENRR at  $U = 0$  V along the associative  $N_2H$  pathway on O-vac.

## REFERENCES

- 1 Z. Wei, Y. Feng and J. Ma, *J. Energy Chem.*, 2020, **48**, 322–327.
